# Supplementary material for: Bemisia tabaci Vesicle-Associated Membrane Protein 2 Interacts with Begomoviruses and Plays a Role in Virus Acquisition
Source: Cells. 2021 Jul 5;10(7):1700. doi: 10.3390/cells10071700 (PMC8306474; doi:10.3390/cells10071700)
Supplement: Supplementary file 1 [file cells-10-01700-s001.zip › Table S1 The candidate proteins of MEAM1 whitefly identified by Co-IP and LC-MS_MS analysis.xlsx]

## Sheet: Sheet1
Table S1 The candidate proteins of MEAM1 whitefly identified by Co-IP and LC-MS/MS analysis.
	Accession	Description	Score	Coverage	# Proteins	# Unique Peptides	# Peptides	# PSMs	calc. pI
1	Bta00007	Piwi-like protein	2.07755	1.3	1	1	1	1	9.36377
2	Bta00034	Ferric-chelate reductase 1	2.10057	1.71	1	1	1	1	8.06006
3	Bta00053	Alpha-parvin, putative	0	13.39	1	1	1	1	5.5542
4	Bta00069	Cathepsin L-like protease	2.414	3.62	1	1	1	1	9.08545
5	Bta00076	Centrosomin	2.0251	0.86	1	1	1	1	5.75732
6	Bta00081	Golgin subfamily A member	4.15668	5.33	1	2	2	4	5.97314
7	Bta00085	Metaxin-1	2.51564	8.94	1	1	1	1	8.63135
8	Bta00088	60S ribosomal protein L36	7.30558	7.03	1	1	1	3	11.0337
9	Bta00099	Ankyrin repeat protein	2.0408	1.15	1	1	1	1	5.93506
10	Bta00102	Ankyrin repeat protein	13.3885	3.73	1	2	2	6	6.99072
11	Bta00108	F-box/LRR-repeat protein 2	2.31826	3.09	1	1	1	1	6.48096
12	Bta00134	Elongation factor 2	2.03956	1.18	1	1	1	1	6.55127
13	Bta00137	Piezo-type mechanosensitive ion channel component 1	4.43922	1.18	1	2	2	3	8.00146
14	Bta00199	Unknown protein	6.61065	4.76	1	1	1	5	11.4438
15	Bta00251	Nose resistant to fluoxetine protein 6	5.16626	2.21	1	1	1	2	8.06006
16	Bta00257	Transcription termination factor 2	7.12449	2.52	1	1	2	4	6.16357
17	Bta00277	TELO2-interacting protein 1 homolog	2.22339	1.15	1	1	1	2	6.39209
18	Bta00281	Spectrin alpha chain	7.49364	1.24	1	3	3	3	5.22412
19	Bta00311	Unknown protein	15.6489	5.67	1	1	1	7	8.60205
20	Bta00329	Trehalase	4.11144	1.7	1	1	1	2	4.97021
21	Bta00363	AT-rich interactive domain-containing protein 4B	6.22529	0.57	1	1	1	3	6.43018
22	Bta00417	T-complex protein 1 subunit gamma	4.67148	2	1	1	1	2	6.81494
23	Bta00418	Protein bicaudal D	6.20791	2.01	1	1	1	3	5.18604
24	Bta00429	Unknown protein	2.01734	6.47	1	1	1	1	9.33447
25	Bta00430	Prefoldin subunit, putative	2.08974	8.39	1	1	1	1	9.18799
26	Bta00444	T-complex protein 1 subunit alpha	2.09656	1.8	1	1	1	1	6.48096
27	Bta00472	P74	4.41974	2.06	1	1	1	2	6.80029
28	Bta00475	Gametocyte-specific factor	2.50845	3.89	1	1	1	1	8.79248
29	Bta00501	Lupus La protein	2.12433	2.97	1	1	1	1	5.63037
30	Bta00544	Ribosomal protein kinase, putative	4.87722	5.31	1	1	1	2	11.1802
31	Bta00733	Ankyrin 2, isoform F	3.91476	2.68	1	1	1	3	6.39209
32	Bta00774	NADH dehydrogenase [ubiquinone] 1 alpha subcomplex subunit 6	2.55484	8	1	1	1	1	9.99365
33	Bta00835	UTP11-like U3 small nucleolar ribonucleoprotein	2.08387	5.14	1	1	1	1	10.2427
34	Bta00868	LETM1 domain-containing protein 1	2.24395	3.62	1	1	1	1	9.78857
35	Bta00887	Eukaryotic peptide chain release factor subunit 1	2.39677	4.35	3	1	1	1	6.0874
36	Bta00955	ATP synthase mitochondrial F1 complex assembly factor 2	2.58116	9.69	1	1	1	1	8.48486
37	Bta00990	Unknown protein	4.17648	5.74	1	1	1	3	8.36768
38	Bta01009	Unknown protein	2.00016	0.7	1	1	1	1	11.3267
39	Bta01019	Beta-1,3-galactosyltransferase 6	4.47592	3.34	1	1	1	3	8.66064
40	Bta01023	Peptidyl-prolyl cis-trans isomerase	2.16444	4.77	1	1	1	1	4.61475
41	Bta01028	DNA replication licensing factor, putative	2.01139	1.76	1	1	1	1	5.73193
42	Bta01031	Regulator of nonsense transcripts 2	4.25108	1.63	1	2	2	3	5.16064
43	Bta01142	Juvenile hormone-inducible protein	2.54969	6.05	1	1	1	1	5.87158
44	Bta01154	F-actin-capping protein subunit beta	2.56645	10.18	1	1	1	2	5.10986
45	Bta01191	Tropomyosin-2, putative	2.10404	2.29	1	1	1	1	4.95752
46	Bta01198	Meiosis arrest female protein 1	5.26176	1.4	1	1	1	3	7.92822
47	Bta01205	Zinc finger protein 208	2.12512	1.2	1	1	1	1	8.17725
48	Bta01215	Mediator of RNA polymerase II transcription subunit 26	2.09353	3.66	1	1	1	1	6.13818
49	Bta01270	3-hydroxyisobutyrate dehydrogenase	4.05902	5.81	1	1	1	2	8.03076
50	Bta01290	Inosine-5'-monophosphate dehydrogenase	6.46334	2.8	1	1	1	2	7.66455
51	Bta01311	Calmodulin-regulated spectrin-associated protein 1	4.48866	1.04	1	1	1	2	8.68994
52	Bta01389	Transmembrane channel-like protein 3	3.25336	3	1	1	1	1	6.68311
53	Bta01399	Ceramide synthase 6	2.20367	4.55	1	1	1	1	8.20654
54	Bta01409	Coiled-coil domain-containing protein lobo-like protein	2.57416	2.38	1	1	1	2	8.5874
55	Bta01417	Lipase	0	9.73	1	1	1	1	8.44092
56	Bta01425	Phosphatidylethanolamine-binding protein 1	2.67089	6.51	1	1	1	2	5.26221
57	Bta01459	Protein CBG24836	2.13558	1.56	1	1	1	1	6.37939
58	Bta01626	Rho GTPase-activating protein	2.59412	12.84	1	1	1	1	9.45166
59	Bta01634	WD repeat-containing protein 49	3.14257	4.75	1	1	1	1	7.78174
60	Bta01638	Prohibitin-2	2.25496	4.08	1	1	1	1	9.23193
61	Bta01712	Unknown protein	4.32008	5.57	1	1	2	3	7.91357
62	Bta01732	SWI/SNF-related matrix-associated actin-dependent regulator of chromatin subfamily A member 5	4.07989	2.19	1	1	2	2	6.99072
63	Bta01786	Autism susceptibility gene 2 protein	6.22267	1.57	1	1	1	3	7.98682
64	Bta01789	General transcription factor 3C polypeptide 1	2.11704	0.72	1	1	1	1	8.92432
65	Bta01820	Ionotropic glutamate receptor	2.11968	1.32	1	1	1	1	5.24951
66	Bta01835	DNA-directed RNA polymerase	2.02572	0.77	1	1	1	1	8.646
67	Bta01868	Band 4.1-like protein 3	6.20217	1.39	1	1	1	3	7.81104
68	Bta01876	Liprin-alpha-2	2.03772	1.52	1	1	1	1	6.56592
69	Bta01925	Dolichyl-diphosphooligosaccharide--protein glycosyltransferase 48 kDa subunit	7.17759	4.28	2	1	1	3	6.27783
70	Bta01947	Unknown protein	2.07075	8.26	1	1	1	1	7.1958
71	Bta01950	mRNA-capping enzyme	2.0615	2.18	1	1	1	1	8.25049
72	Bta01984	DNA repair protein XRCC3	2.38141	3.42	1	1	1	2	7.89893
73	Bta01993	Charged multivesicular body protein 4C, putative	2.06656	5.88	1	1	1	1	4.97021
74	Bta01998	26S proteasome non-ATPase regulatory subunit 13	2.52417	3.1	1	1	1	1	6.27783
75	Bta02000	Vacuolar membrane protease	0	5.59	1	1	1	1	6.85889
76	Bta02005	E3 ubiquitin-protein ligase HERC2	4.16664	0.7	1	2	2	2	6.52197
77	Bta02109	Intraflagellar transport protein 74-like protein	2.15342	2.75	1	1	1	1	5.31299
78	Bta02114	Condensin-2 complex subunit D3	2.67158	1.48	1	1	1	1	5.63037
79	Bta02128	26S proteasome non-ATPase regulatory subunit, putative	2.67424	1.2	1	1	1	1	5.41455
80	Bta02150	Gag-Pol polyprotein	2.30207	6.34	1	1	1	1	10.1548
81	Bta02175	39S ribosomal protein L16, mitochondrial	4.15507	6.72	1	1	1	2	9.75928
82	Bta02194	Dynactin subunit	4.65599	3.37	1	2	2	2	5.71924
83	Bta02213	Pol polyprotein	2.00705	1.33	1	1	1	1	8.47021
84	Bta02220	Reverse transcriptase	2.02159	2.03	2	1	1	1	8.76318
85	Bta02226	Unknown protein	2.1291	4	1	1	1	1	9.42236
86	Bta02307	Ras-related protein Rab-45	2.03028	2.13	1	1	1	1	5.35107
87	Bta02330	Calcium-transporting ATPase	10.9157	2.46	1	2	2	3	7.37158
88	Bta02394	Flotillin-2	2.00891	3.57	1	1	1	1	5.79541
89	Bta02409	ATP-dependent RNA helicase, putative	4.40702	2.14	1	1	2	2	8.77783
90	Bta02415	Cytochrome P450	2.22512	2.3	1	1	1	2	9.12939
91	Bta02425	26S protease regulatory subunit 4	2.87984	2.73	1	1	1	1	6.75635
92	Bta02426	Dihydrolipoyllysine-residue succinyltransferase component of 2-oxoglutarate dehydrogenase complex	3.41658	4.76	1	1	1	1	6.04932
93	Bta02430	Transmembrane protein 120A	2.04797	3.39	1	1	1	1	8.79248
94	Bta02438	Ribosomal protein L23A	2.17992	4.01	1	1	1	1	10.3892
95	Bta02440	Glucose dehydrogenase	2.27521	2.88	1	1	1	1	8.66064
96	Bta02454	Cellular nucleic acid-binding protein	12.9262	1.66	1	1	2	8	7.54736
97	Bta02457	Microtubule-associated protein 1A, putative	6.40632	0.72	1	2	2	4	5.13525
98	Bta02461	TATA box-binding protein-associated factor RNA polymerase I subunit B	2.08549	1.8	1	1	1	1	8.38232
99	Bta02514	Phosphorylase b kinase regulatory subunit alpha, liver isoform	3.18838	1.34	1	1	1	1	5.84619
100	Bta02602	UDP-glucuronosyltransferase	14.7631	6.45	1	3	3	6	7.84033
101	Bta02633	Unknown protein	4.31156	2.6	1	1	1	2	7.03467
102	Bta02675	LIM domain kinase 1	2.56378	2.1	1	1	1	1	7.56201
103	Bta02682	Non-lysosomal glucosylceramidase	2.02288	2.34	1	1	1	1	5.70654
104	Bta02689	Kinesin-like protein	2.22621	0.85	1	1	1	1	5.88428
105	Bta02712	Glutamate receptor 1	2.09252	2.01	1	1	1	1	8.17725
106	Bta02716	Reverse transcriptase	2.08734	1.19	1	1	1	1	9.21729
107	Bta02730	Reverse transcriptase	7.82297	2.55	2	2	2	3	9.08545
108	Bta02736	Unknown protein	2.00145	2.34	1	1	1	1	7.6499
109	Bta02772	63 kDa sperm flagellar membrane protein	2.06845	0.27	1	1	1	1	7.07861
110	Bta02779	Guanine nucleotide-binding protein Gq alpha subunit	2.24564	4.25	1	1	1	1	5.32568
111	Bta02812	4,5 dioxygenase extradiol	2.15338	4.92	1	1	1	1	6.69775
112	Bta02958	Conserved oligomeric Golgi complex subunit 3	2.01845	1.8	1	1	1	1	6.01123
113	Bta02967	UPF0489 protein C5orf22	3.31713	23.74	1	1	1	2	5.8208
114	Bta03007	Protein lines	2.02378	1.87	1	1	1	1	5.42725
115	Bta03012	Myosin, putative	2.02068	0.83	1	1	1	2	7.84033
116	Bta03027	Protein flightless-1	2.21147	1.29	1	1	1	2	5.74463
117	Bta03044	Dumpy, isoform P	2.04667	2.86	1	1	1	1	6.60986
118	Bta03066	Coiled-coil domain-containing protein CG32809	2.1313	12.98	1	1	1	2	4.85596
119	Bta03114	OTU domain-containing protein 5-A	2.01754	8.22	1	1	1	1	9.5835
120	Bta03276	Eukaryotic translation initiation factor 2D	2.60713	4.06	1	1	1	2	8.49951
121	Bta03295	Proline dehydrogenase 1, mitochondrial	49.699	15.02	1	7	7	17	8.70459
122	Bta03301	Unknown protein	2.0994	3.88	1	1	1	1	5.26221
123	Bta03304	Homeobox protein unc-4	2.5925	7.3	1	1	1	3	6.68311
124	Bta03321	Serine/threonine-protein phosphatase 2A 56 kDa regulatory subunit epsilon isoform	2.10218	2.47	1	1	1	1	8.1333
125	Bta03363	Protein grainyhead	2.07525	3.36	1	1	1	1	7.60596
126	Bta03366	FCH domain only protein 2	17.2092	1.97	1	1	1	8	8.6167
127	Bta03369	CG7802, isoform A	2.25128	8	1	1	1	1	7.50342
128	Bta03373	Transmembrane protein 208	2.01131	8.09	1	1	1	1	9.48096
129	Bta03390	BCL-6 corepressor	2.48002	1.14	1	1	1	2	9.62744
130	Bta03409	ATP-binding cassette sub-family G member 8	2.2042	1.37	1	1	1	1	8.45557
131	Bta03411	ATP-binding cassette sub-family G member 5	2.54427	5.06	1	1	1	1	8.60205
132	Bta03446	Unknown protein	2.0324	7.24	1	1	1	1	9.78857
133	Bta03459	26S protease regulatory subunit 7	8.34422	5.29	1	2	2	3	5.68115
134	Bta03496	Unknown protein	2.03898	5.56	1	1	1	1	9.68604
135	Bta03515	Cilia- and flagella-associated protein 20	2.35428	8.29	1	1	1	1	9.89111
136	Bta03518	Ribosomal protein L11	5.95184	7.37	1	1	1	2	9.96436
137	Bta03538	Unknown protein	4.04694	2.36	1	1	1	2	8.08936
138	Bta03540	40S ribosomal protein S12	2.85355	12.41	1	1	1	1	5.10986
139	Bta03546	GTP cyclohydrolase	13.9103	4.6	1	1	1	5	6.80029
140	Bta03554	G2/mitotic-specific cyclin-B3, putative	3.36829	9.16	1	1	1	1	9.08545
141	Bta03578	Down syndrome cell adhesion molecule, isoform BF	2.65349	1.52	1	1	1	1	7.79639
142	Bta03640	PR domain zinc finger protein 13	2.24989	6.94	1	1	1	1	9.30518
143	Bta03669	AAEL006846-PA	2.10187	2.87	1	1	1	1	7.13721
144	Bta03670	Longitudinals lacking protein, isoforms F/I/K/T	2.01483	3.55	1	1	1	1	9.08545
145	Bta03680	Kelch-like protein 25	2.18618	2.79	1	1	1	1	9.45166
146	Bta03683	Unknown protein	2.51925	4.11	1	1	1	1	5.22412
147	Bta03724	Ras-related protein Rab-21	2.05183	8.8	1	1	1	1	8.82178
148	Bta03735	Small conductance calcium-activated potassium channel protein	3.05866	7.97	1	1	1	1	9.12939
149	Bta03776	Unknown protein	2.0028	7.53	1	1	1	1	6.02393
150	Bta03788	Dedicator of cytokinesis protein 1	4.24512	0.71	1	1	1	2	7.79639
151	Bta03795	CDGSH iron sulfur domain-containing protein 2-like protein	2.02346	10.32	1	1	1	1	9.0708
152	Bta03800	Lysosomal-trafficking regulator	3.16849	1.22	1	1	1	1	6.69775
153	Bta03831	Reverse transcriptase	2.39339	1.24	2	1	1	1	9.24658
154	Bta03886	Brain-specific angiogenesis inhibitor 1-associated protein	2.23289	1.67	1	1	1	1	8.41162
155	Bta03921	Atlastin	5.28014	5.16	1	2	2	2	6.06201
156	Bta03940	Unknown protein	4.22087	2.25	1	1	1	2	9.86182
157	Bta03953	Unknown protein	2.13248	5.4	1	1	1	1	7.57666
158	Bta04138	DNA repair protein complementing XP-C cells-like protein	0	5.08	1	1	1	2	9.08545
159	Bta04144	Lipid storage droplets surface-binding protein 1	4.17008	2.98	1	1	1	2	7.29834
160	Bta04160	Unknown protein	2.71231	3.78	1	1	1	2	6.96143
161	Bta04176	Tether containing UBX domain for GLUT4	2.27868	3.06	1	1	1	1	5.45264
162	Bta04180	ATP-dependent Clp protease ATP-binding subunit Clpx, putative	2.25871	2.61	1	1	1	1	8.71924
163	Bta04211	Serpin-34	2.17906	0.77	1	1	1	1	4.84326
164	Bta04219	E3 ubiquitin-protein ligase	2.03345	1.05	1	1	1	1	5.5415
165	Bta04227	Unknown protein	2.17696	2.06	1	1	1	1	9.18799
166	Bta04251	Cytochrome c oxidase assembly factor 5	2.06555	7.12	2	1	1	1	9.72998
167	Bta04256	CG5630, isoform B	7.47663	4.21	1	1	1	3	4.83057
168	Bta04261	EFR3-like protein A	2.15386	1.44	1	1	1	2	5.66846
169	Bta04284	Ribosomal protein L34	2.80962	12.84	1	1	1	2	11.2534
170	Bta04341	Synaptotagmin	2.90641	3	1	1	1	1	7.35693
171	Bta04347	E3 ubiquitin-protein ligase UBR2	2.0152	0.59	1	1	1	1	6.25244
172	Bta04352	Transcriptional enhancer factor TEF-1	2.55493	5.59	1	1	1	1	9.12939
173	Bta04376	Unknown protein	4.2594	6.48	1	2	2	2	8.88037
174	Bta04392	Pre-mRNA splicing factor Syf1, putative	4.3105	1.62	1	1	1	2	5.2749
175	Bta04424	Aconitate hydratase	18.0592	4.58	1	3	3	8	8.06006
176	Bta04453	Vitellogenin-B	2.00799	0.16	1	1	1	1	6.25244
177	Bta04456	Unknown protein	2.4497	5.95	1	1	1	1	9.99365
178	Bta04484	Guanine nucleotide-binding protein subunit alpha-like protein	2.70757	5.71	1	1	1	1	8.92432
179	Bta04518	Ribosomal protein S18	2.03984	5.26	1	1	1	1	10.3599
180	Bta04520	RanBP-type and C3HC4-type zinc finger-containing protein 1	2.13628	1.9	1	1	1	2	6.26514
181	Bta04538	Carboxylesterase	2.04384	2.07	1	1	1	1	6.75635
182	Bta04554	Metalloendopeptidase	6.10846	4.63	1	1	1	3	8.60205
183	Bta04556	Otoferlin	2.37186	0.73	1	1	1	2	9.34912
184	Bta04566	Kinesin-like protein	2.56853	2.28	1	1	1	1	5.8208
185	Bta04625	Unknown protein	2.40162	5.91	1	1	1	1	7.73779
186	Bta04704	ATP synthase subunit e, mitochondrial	23.2487	25.27	1	2	2	10	9.78857
187	Bta04746	A disintegrin and metalloproteinase with thrombospondin motifs 10	4.72094	0.81	1	2	2	2	5.04639
188	Bta04776	Cathepsin B	2.7122	5.8	1	1	1	2	7.31299
189	Bta04802	General vesicular transport factor p115	4.49496	0.79	1	1	1	2	4.90674
190	Bta04962	5'-3' exoribonuclease 1	2.11059	1.26	1	1	1	1	7.26904
191	Bta04967	Myosin-9, putative	63.6444	5.33	1	8	8	25	5.99854
192	Bta04991	Trans-2-enoyl-CoA reductase, mitochondrial	2.5041	3.49	1	1	1	1	8.52881
193	Bta05023	Cytochrome b561, putative	2.19724	1.11	1	1	1	1	8.67529
194	Bta05045	Protein SLC7A6OS	4.2267	4.94	1	1	1	2	4.36084
195	Bta05059	RNA polymerase-associated protein LEO1, putative	2.00061	1.7	1	1	1	1	7.10791
196	Bta05082	Endothelin-converting enzyme 2	3.61735	9.42	1	1	1	2	6.55127
197	Bta05132	Peptide deformylase like protein	2.15265	8.14	1	1	1	2	8.66064
198	Bta05137	Regulatory-associated protein of mTOR, putative	2.12385	1.61	1	1	1	1	7.26904
199	Bta05144	Unknown protein	2.59552	3.52	1	1	1	1	8.42627
200	Bta05235	Scavenger receptor	4.12272	0.93	1	1	2	2	6.7417
201	Bta05267	Chaperone protein DnaJ	4.57107	4.08	1	1	1	2	6.7417
202	Bta05311	Acetyl coenzyme A synthetase	2.69161	3.03	1	1	1	1	6.97607
203	Bta05350	ATP-dependent RNA helicase, putative	2.08717	2.49	1	1	1	1	7.6499
204	Bta05423	Glutamate synthase	2.07326	0.72	1	1	1	1	6.82959
205	Bta05570	Troponin T	2.42375	2.61	1	1	1	1	4.83057
206	Bta05595	AAA-ATPase-like domain-containing protein	5.36047	4.44	1	1	1	2	7.1958
207	Bta05670	Cubilin	2.06972	0.74	1	1	1	1	6.01123
208	Bta05709	Zinc knuckle protein	4.05624	6.65	1	2	2	2	8.29443
209	Bta05713	Vigilin	2.04811	1.65	1	1	1	1	5.87158
210	Bta05720	Peptide chain release factor 1	2.14626	6.02	1	1	1	1	7.73779
211	Bta05733	Unknown protein	2.03324	1.04	1	1	1	1	4.61475
212	Bta05747	Unknown protein	2.10786	4.87	1	1	1	1	4.1958
213	Bta05781	Peroxidase	2.3278	1.13	1	1	1	1	6.68311
214	Bta05797	Unknown protein	6.20278	3.56	1	1	1	3	8.41162
215	Bta05851	Casein kinase I isoform gamma-3	2.66671	7.14	1	1	1	1	9.18799
216	Bta05904	60S ribosomal protein L10	6.22796	8.11	1	1	1	3	10.0962
217	Bta05983	Reverse transcriptase	4.12993	2.15	2	2	2	2	9.0708
218	Bta05996	Mitochondrial carrier protein	2.76923	8.99	1	1	1	2	9.27588
219	Bta06011	Chaperone activity of bc1 complex-like, mitochondrial	10.9566	4.88	1	2	2	8	6.44287
220	Bta06038	Eukaryotic translation initiation factor 3 subunit K	2.03988	9.29	1	1	1	1	7.04932
221	Bta06064	ATPase-like fidgetin	2.00676	1.65	1	1	1	1	6.16357
222	Bta06070	60S ribosomal protein L24	2.50418	8.23	1	1	1	1	11.356
223	Bta06102	Transmembrane protein 68	2.60837	7.21	1	1	1	1	8.90967
224	Bta06161	39S ribosomal protein L41, mitochondrial	3.26541	26.67	1	1	1	1	9.45166
225	Bta06199	Nucleobindin-1, putative	2.54601	7.57	1	1	1	1	5.61768
226	Bta06274	HEAT repeat-containing protein 5B	2.23671	1.3	1	1	1	1	5.47803
227	Bta06279	Gag-Pol polyprotein	2.39278	1.76	1	1	1	1	8.52881
228	Bta06281	Elongation of very long chain fatty acids protein	2.03536	8.59	1	1	1	1	9.53955
229	Bta06288	RNA-directed DNA polymerase from mobile element jockey	2.13998	1.7	1	1	1	1	9.39307
230	Bta06312	Unknown protein	3.32673	4.05	1	1	1	1	7.18115
231	Bta06322	Pseudouridine-metabolizing bifunctional protein-like protein	3.00721	15.79	1	1	1	1	6.59521
232	Bta06404	Vesicular glutamate transporter 2	0	9.42	1	1	1	1	8.70459
233	Bta06416	Ribosomal protein L26	2.07054	4.67	1	1	1	1	10.77
234	Bta06427	Exportin-5	4.82442	1.49	1	1	1	2	6.63916
235	Bta06495	Ubiquitin-protein ligase BRE1A, putative	4.08105	2.53	1	1	2	2	6.41748
236	Bta06517	Gag-like protein	4.65183	1.04	2	1	1	2	8.1333
237	Bta06546	Mitochondrial inner membrane protease ATP23-like protein	2.24718	4.78	1	1	1	1	7.40088
238	Bta06596	Transporter	4.33311	1.46	1	1	1	2	7.51807
239	Bta06614	Adenylosuccinate synthetase	2.10159	2.83	2	1	1	1	6.27783
240	Bta06726	Wiskott-Aldrich syndrome protein family member 3	2.01534	3.2	1	1	1	1	8.22119
241	Bta06756	Arylsulfatase B	2.02448	1.5	1	1	1	1	6.82959
242	Bta06806	Methyltransferase-like protein 14-like protein	3.0096	11	1	1	1	1	8.88037
243	Bta06821	Carboxylesterase	17.6452	3.35	5	1	2	7	6.75635
244	Bta06826	Huntingtin	4.71725	1.7	1	2	2	2	6.31592
245	Bta06849	Alpha-glucosidase family 31	22.954	5.92	1	3	3	9	6.45557
246	Bta06850	Centrosomal protein of 120 kDa	2.23197	1.23	1	1	1	1	7.6499
247	Bta06897	Polycomb complex protein BMI-1-B	2.10072	1.77	1	1	1	1	9.67139
248	Bta06898	DNA mismatch repair protein MutL	2.91537	2.85	1	1	1	1	7.73779
249	Bta06921	Unknown protein	5.36739	10.56	1	1	1	2	5.16064
250	Bta06944	Syntaxin binding protein-1,2,3	3.22617	6.83	1	1	1	1	7.34229
251	Bta06967	Cytochrome P450	2.15295	2.13	1	1	1	1	8.36768
252	Bta06969	Cytochrome P450	4.1857	3.08	1	1	1	2	8.71924
253	Bta07006	Adenylate cyclase type 2	4.79268	3.72	1	2	2	2	7.31299
254	Bta07017	Golgin subfamily A member 4	4.67196	1.83	1	1	2	3	5.51611
255	Bta07078	5'-nucleotidase domain-containing protein 3	5.27314	5.16	1	1	1	2	7.03467
256	Bta07156	Unknown protein	2.00626	21.21	1	1	1	1	5.98584
257	Bta07173	Unknown protein	2.04997	7.55	1	1	1	1	10.9897
258	Bta07174	Inactive ubiquitin carboxyl-terminal hydrolase 54	2.66933	1.18	1	1	1	1	8.88037
259	Bta07180	Phospholipase A-2-activating protein, putative	2.7991	2.05	1	1	1	1	5.5415
260	Bta07265	Catenin alpha	4.09585	0.99	1	1	1	2	5.92236
261	Bta07288	Leucine Rich repeat protein	14.262	2.61	1	1	1	5	8.1626
262	Bta07294	Transmembrane protein 214-A	10.7392	1.99	1	1	1	4	9.53955
263	Bta07297	Unknown protein	2.18893	6.87	1	1	1	1	10.4331
264	Bta07307	Unknown protein	2.32299	9.36	1	1	1	1	5.21143
265	Bta07327	Ral GTPase-activating protein subunit alpha-2	0	2.21	1	1	1	1	7.03467
266	Bta07414	Neurobeachin-like protein 1	6.67625	19.05	2	1	1	3	10.5942
267	Bta07527	Thyroid adenoma-associated protein	2.57757	1.04	1	1	1	2	6.53662
268	Bta07535	Histone-lysine n-methyltransferase	2.03217	1.27	1	1	1	1	6.354
269	Bta07665	Sallimus, isoform R	6.53491	0.68	1	3	3	3	6.25244
270	Bta07744	Glycerate kinase	2.22229	2.9	1	1	1	1	6.63916
271	Bta07747	Sarcalumenin	7.7164	1.58	1	1	1	3	4.48779
272	Bta07775	ATP-dependent RNA helicase DDX3X	2.2016	2.43	1	1	1	2	7.57666
273	Bta07810	DnaJ-like protein subfamily C member 28	2.1844	3.62	1	1	1	1	8.83643
274	Bta07847	Circadian clock-controlled protein	2.08785	5.82	1	1	1	1	8.25049
275	Bta07876	Transcription factor Adf-1	2.15829	5.45	1	1	1	1	6.55127
276	Bta07888	Gag-Pol polyprotein	2.02645	3.18	1	1	1	1	6.97607
277	Bta07894	Fatty acid oxidation complex subunit alpha	3.00839	15.77	1	1	1	1	6.03662
278	Bta07895	Cuticular protein 127, RR-1 family	2.11346	1.95	1	1	1	1	6.31592
279	Bta07912	Alpha-tocopherol transfer protein-like	2.20251	5.82	1	1	1	1	6.45557
280	Bta07916	Tubulin alpha-3 chain	170.951	37.78	1	1	12	57	5.09717
281	Bta07963	Golgi integral membrane protein 4	2.00219	2.97	1	1	1	1	5.79541
282	Bta07987	Reverse transcriptase	2.07964	1.08	2	1	1	1	9.0708
283	Bta07995	Conserved uncharacterized protein	2.00166	10.2	1	1	1	1	8.23584
284	Bta08005	Breast cancer type 2 susceptibility protein	3.133	1.24	1	1	1	1	7.38623
285	Bta08019	Tan	2.02182	2.81	1	1	1	1	6.22705
286	Bta08043	L-lactate dehydrogenase	3.21181	14.2	1	1	1	1	8.07471
287	Bta08078	HEAT repeat-containing protein 5B	2.05752	0.98	1	1	1	1	7.21045
288	Bta08133	Aldehyde dehydrogenase	2.09555	4.3	1	1	1	1	6.48096
289	Bta08184	60S ribosomal protein L18	8.30672	14.36	1	2	2	3	11.6489
290	Bta08193	Broad complex isoform 7	0	11.29	1	1	1	1	5.85889
291	Bta08198	Kinesin-associated protein 3	3.10477	5.86	1	1	1	1	5.74463
292	Bta08234	Connector enhancer of kinase suppressor of ras 2	2.03675	0.74	1	1	1	1	8.51416
293	Bta08251	Alpha tocopherol transfer protein	2.01657	5.18	1	1	1	1	9.21729
294	Bta08267	Protein takeout	2.02563	5.3	1	1	1	1	9.1001
295	Bta08317	Zinc finger MYM-type protein 1	2.19097	4.6	1	1	1	1	9.02686
296	Bta08322	Isocitrate dehydrogenase [NADP]	9.85491	5.38	2	2	2	4	6.99072
297	Bta08411	Thymidine phosphorylase	2.53232	4.61	1	1	1	1	5.52881
298	Bta08446	Tethering factor for nuclear proteasome STS1	3.74146	6.59	1	1	1	2	9.48096
299	Bta08447	V-type ATP synthase alpha chain	62.6899	17.26	1	7	7	21	5.38916
300	Bta08456	Unknown protein	2.05618	22.08	1	1	1	1	4.95752
301	Bta08471	Unknown protein	2.17981	5.62	1	1	1	1	7.44482
302	Bta08506	Galectin	2.25197	4.74	1	1	1	2	6.32861
303	Bta08517	Glycosyltransferase-like LARGE1	2.19503	2.17	1	1	1	1	8.74854
304	Bta08523	Anaphase-promoting complex subunit 2	2.10833	1.55	1	1	1	1	5.41455
305	Bta08533	ATP-dependent DNA helicase Q4	6.63272	1	1	1	1	4	7.57666
306	Bta08577	Protein VPRBP	2.07024	0.89	1	1	1	1	5.33838
307	Bta08578	Protein regulator of cytokinesis 1	2.018	3.18	1	1	1	1	9.43701
308	Bta08700	Unknown protein	2.30801	5.91	1	1	1	1	11.1802
309	Bta08726	Mitotic spindle assembly checkpoint protein MAD1	2.54209	2.33	1	1	1	1	6.25244
310	Bta08742	Chloride intracellular channel	2.12356	4.65	1	1	1	1	5.94775
311	Bta08752	N-acylneuraminate-9-phosphatase	2.18146	5.05	1	1	1	1	5.98584
312	Bta08771	Y+L amino acid transporter 2	0	6.61	1	1	1	1	8.25049
313	Bta08890	70 kDa heat shock protein	2.11944	2.44	1	1	1	1	6.58057
314	Bta08900	Ubiquitin conjugation factor E4 A	3.63969	4.83	1	1	1	2	5.78271
315	Bta08916	Unknown protein	2.92469	11.63	1	1	1	1	10.0669
316	Bta08922	Glutamate receptor, putative	2.01891	1.67	1	1	1	1	8.23584
317	Bta08932	Acyl-CoA desaturase 1	3.0636	3.53	1	1	1	1	7.7085
318	Bta08962	Pol polyprotein	2.50969	4.15	1	1	1	1	8.29443
319	Bta08974	Nose resistant to fluoxetine protein 6	0	7.94	1	1	1	2	8.42627
320	Bta08976	Centrosomal protein of 135 kDa	2.0092	0.57	1	1	1	1	7.66455
321	Bta09003	ATP-dependent RNA helicase	22.4552	10.43	1	3	3	8	8.1626
322	Bta09008	Ccch zinc finger domain protein	2.23895	1.8	1	1	1	1	6.58057
323	Bta09023	Unknown protein	2.16087	1.52	1	1	1	1	8.96826
324	Bta09025	Unknown protein	3.21815	6.69	1	1	1	1	10.3013
325	Bta09033	Condensin complex subunit 3	4.31252	2.05	1	1	2	3	8.86572
326	Bta09075	IQ and ubiquitin-like domain-containing protein	2.15125	2.07	1	1	1	2	8.14795
327	Bta09118	Ornithine decarboxylase	8.55562	2.2	1	1	1	4	5.40186
328	Bta09191	Rootletin	2.04973	2.13	1	1	1	1	5.2749
329	Bta09204	60S ribosomal protein L21	4.99229	9.94	1	1	1	2	10.9604
330	Bta09213	SUN domain-containing protein 1	2.03321	0.89	1	1	1	1	8.51416
331	Bta09223	Citrate synthase	2.09382	3	1	1	1	1	8.47021
332	Bta09238	WD repeat-containing protein 91	2.01518	2.5	1	1	1	1	7.48877
333	Bta09250	Dynamin-like 120 kDa protein, mitochondrial	2.2173	1.63	1	1	1	1	8.73389
334	Bta09281	Unknown protein	3.70684	18.57	1	1	1	2	4.29736
335	Bta09285	Ras-related protein Rab-3	7.11601	11.59	9	1	2	4	5.50342
336	Bta09287	Chaperone protein HtpG	11.5928	4.29	1	3	3	5	5.05908
337	Bta09309	Unknown protein	2.23882	4.57	1	1	1	1	5.43994
338	Bta09344	Unknown protein	2.04542	1.04	1	1	1	1	6.60986
339	Bta09357	LINE-1 retrotransposable element ORF2 protein	2.11463	2.23	1	1	1	1	8.89502
340	Bta09361	Zinc finger protein 84	2.0996	1.52	2	1	1	1	8.26514
341	Bta09370	ARF GTPase-activating protein GIT2	2.23404	1.29	1	1	1	1	8.38232
342	Bta09399	NADH dehydrogenase [ubiquinone] 1 alpha subcomplex subunit 10, mitochondrial	2.1689	2.93	1	1	1	1	8.30908
343	Bta09423	Protein kinase, putative	4.08291	4.47	1	1	1	2	6.53662
344	Bta09430	Ribosomal protein S6 kinase-like protein	2.01749	1.3	1	1	1	1	6.59521
345	Bta09475	Cytochrome c oxidase subunit 5B, mitochondrial	5.586	14.17	1	1	1	2	8.71924
346	Bta09500	Chondroitin sulfate synthase 2	2.603	2.98	1	1	1	1	8.89502
347	Bta09533	Beta-1,4-galactosyltransferase 7	2.61779	10.88	2	1	1	1	9.74463
348	Bta09540	Calcium uptake protein 3, mitochondrial	2.21092	3.43	1	1	1	1	8.54346
349	Bta09572	Cuticle protein	2.20236	13.56	1	1	1	1	6.7124
350	Bta09670	Lysine-specific demethylase 4	3.0046	6.88	1	1	1	1	8.73389
351	Bta09722	Splicing factor U2AF 50 kDa subunit	2.09672	3.51	1	1	1	1	8.99756
352	Bta09738	Phenylalanine ammonia-lyase	2.11131	1.86	1	1	1	1	6.21436
353	Bta09755	Spectrin beta chain, putative	6.38886	0.72	1	1	2	3	6.48096
354	Bta09757	Endoglucanase	2.08189	1.02	1	1	1	1	8.30908
355	Bta09786	Helicase sen1	2.10693	1.14	1	1	1	1	8.45557
356	Bta09795	FAD-dependent oxidoreductase domain-containing protein 1	2.1232	4.07	1	1	1	1	6.23975
357	Bta09816	Leucine-rich repeat-containing protein 15	2.14554	1.15	1	1	1	1	6.66846
358	Bta09818	3-oxoacyl-reductase	4.05902	5.08	1	1	1	2	8.68994
359	Bta09853	Ribosomal protein P0	22.4754	12.78	1	2	2	7	7.95752
360	Bta09867	70 kDa heat shock protein	30.4309	10.99	3	1	5	11	5.80811
361	Bta09915	AAA-ATPase-like domain-containing protein	2.59888	2.97	1	1	1	1	9.29053
362	Bta09928	Chaperone protein dnaj	2.73809	4.6	1	1	1	1	8.99756
363	Bta09954	Ubiquitin carboxyl-terminal hydrolase	2.044	3.08	1	1	1	1	5.52881
364	Bta09959	Pol polyprotein	2.24732	3.1	1	1	1	2	9.27588
365	Bta09967	Heat shock 70 kDa protein 4L	5.51981	1.97	1	1	1	2	5.52881
366	Bta10009	General transcription factor 3C polypeptide 2	4.39903	1.09	1	2	2	5	6.84424
367	Bta10029	Elongation factor 1-delta	2.07723	6.75	1	1	1	1	4.65283
368	Bta10099	Protocadherin-16, putative	2.62058	1.42	1	1	1	1	5.65576
369	Bta10101	Zinc finger protein, putative	2.00096	2.88	1	1	1	1	10.9897
370	Bta10155	Long-chain fatty acid transport protein 4	2.00718	1.96	1	1	1	1	8.00146
371	Bta10174	Splicing factor, arginine/serine-rich 18	2.10537	1.6	1	1	1	2	9.39307
372	Bta10181	Phosphoglycerate kinase	2.5747	5.21	1	1	1	1	6.58057
373	Bta10200	CG9813, isoform A	2.07296	5.24	1	1	1	1	6.39209
374	Bta10212	Gem-associated protein 5	2.1962	0.97	1	1	1	1	7.51807
375	Bta10225	UTP--glucose-1-phosphate uridylyltransferase	2.01606	1.69	1	1	1	1	7.59131
376	Bta10238	Unknown protein	3.28574	33.55	1	1	1	1	9.43701
377	Bta10239	Neurogenic locus notch, putative	2.09765	0.57	1	1	1	1	6.88818
378	Bta10267	Neuroligin 5	2.70271	2.59	1	1	1	2	8.23584
379	Bta10280	SWI/SNF-related matrix-associated actin-dependent regulator of chromatin subfamily A member 5	2.03982	1.37	1	1	1	1	8.1626
380	Bta10371	Rho-GTPase-activating protein, putative	2.24031	2.1	1	1	1	2	9.90576
381	Bta10378	Gag-Pol polyprotein	2.03633	5.7	1	1	1	1	8.07471
382	Bta10391	Unknown protein	2.14831	8.89	1	1	1	1	9.34912
383	Bta10416	SAGA-associated factor 11 homolog	5.14631	5.88	1	1	1	2	7.31299
384	Bta10436	Golgin subfamily A member	3.08872	3.83	1	1	1	2	4.97021
385	Bta10467	MAP kinase-activating death domain protein	2.06517	0.6	1	1	1	1	8.23584
386	Bta10509	Unknown protein	2.02046	6.86	1	1	1	1	9.21729
387	Bta10542	Elongator complex protein 2	4.22252	1.33	1	1	1	2	6.31592
388	Bta10564	Transketolase	9.82308	4.6	1	2	2	3	8.06006
389	Bta10584	Dedicator of cytokinesis protein 3	2.0051	0.71	1	1	1	1	7.50342
390	Bta10590	Cytochrome b-c1 complex subunit 8	10.1535	27.47	1	2	2	4	9.75928
391	Bta10664	F-box-like/WD repeat-containing protein TBL1XR1	4.1902	3.42	1	1	1	2	5.47803
392	Bta10718	Electron transfer flavoprotein-ubiquinone oxidoreductase, mitochondrial	6.86713	5.32	1	3	3	3	6.41748
393	Bta10770	Transcription initiation factor TFIID subunit 1	2.02852	0.65	1	1	1	1	5.68115
394	Bta10802	Serine/threonine-protein phosphatase 2A 65 kDa regulatory subunit A alpha isoform	3.22262	3.39	1	1	1	1	4.89404
395	Bta10814	Cytochrome b-c1 complex subunit 7	2.50779	15.52	1	1	1	1	8.90967
396	Bta10860	Beta-1,3-galactosyltransferase, putative	2.15582	0.67	1	1	1	1	8.82178
397	Bta10866	Unknown protein	2.20968	2.59	1	1	1	1	9.45166
398	Bta10910	Unknown protein	2.10435	1.36	1	1	1	1	7.54736
399	Bta10925	Fatty acyl-CoA reductase 1	2.19162	2.5	1	1	1	1	8.55811
400	Bta10930	NADH dehydrogenase [ubiquinone] 1 beta subcomplex subunit	2.03505	8.72	1	1	1	1	8.11865
401	Bta10939	Homeobox protein	2.46493	5.96	1	1	1	3	9.77393
402	Bta10962	Oxysterol-binding protein	2.06803	1.69	1	1	1	1	5.38916
403	Bta10963	Kinetochore protein Nuf2	2.08592	3.38	1	1	1	1	5.22412
404	Bta11005	Ubiquitin-conjugating enzyme E2 Q1	4.44383	3.24	1	1	1	2	4.99561
405	Bta11007	EH domain-containing protein 1	4.03028	3.06	1	1	1	1	6.96143
406	Bta11025	GTP-binding nuclear protein Ran	2.57599	6.54	2	1	1	1	7.81104
407	Bta11078	Polyadenylate-binding protein 1	15.7352	4.31	1	2	2	6	9.5249
408	Bta11098	TLD domain-containing protein	2.00201	2.51	1	1	1	1	5.98584
409	Bta11102	Dual specificity testis-specific protein kinase	3.19914	2.63	1	1	1	1	7.69385
410	Bta11128	Glutamyl-tRNA(Gln) amidotransferase subunit A like protein	2.24409	3.89	1	1	1	2	7.35693
411	Bta11140	G2/M phase-specific E3 ubiquitin-protein ligase	4.1302	1	1	1	1	2	9.43701
412	Bta11160	Protoporphyrinogen oxidase	2.07255	2.67	1	1	1	1	8.99756
413	Bta11200	Meiosis-specific nuclear structural protein 1	2.07525	3.91	1	1	1	1	8.17725
414	Bta11214	AAA-ATPase-like domain-containing protein	19.7386	2.76	1	1	1	9	8.47021
415	Bta11222	Pectinesterase	2.03041	3.56	1	1	1	1	8.29443
416	Bta11255	Growth/differentiation factor 6-A	2.08124	2.89	1	1	1	1	7.95752
417	Bta11310	Hamartin	3.29932	4.43	1	1	1	2	7.07861
418	Bta11314	Adducin 1 (Alpha)	2.07128	1.62	1	1	1	1	8.26514
419	Bta11320	TM2 domain-containing protein, putative	2.09731	8.23	1	1	1	1	8.1333
420	Bta11371	Tubulin beta-3 chain	100.075	25.22	1	1	10	36	4.94482
421	Bta11381	Unknown protein	2.02066	13.95	1	1	1	1	11.561
422	Bta11520	Unknown protein	2.21036	10.69	1	1	1	1	10.1401
423	Bta11542	WD and tetratricopeptide repeats protein 1	11.1347	1.8	1	1	1	5	7.73779
424	Bta11571	AGAP004475-PA	2.20959	2.32	1	1	1	1	6.66846
425	Bta11591	Zinc finger protein, putative	2.6421	1.84	1	1	1	1	8.08936
426	Bta11596	Histone-lysine N-methyltransferase MLL5	2.31286	0.95	1	1	1	1	8.92432
427	Bta11608	Coiled-coil domain-containing protein 115	2.17719	10.31	1	1	1	1	6.22705
428	Bta11625	Proteasome subunit alpha type	2.17122	8.97	1	1	1	1	7.09326
429	Bta11644	ACYPI003569 protein	2.02044	0.84	1	1	1	1	6.60986
430	Bta11690	Myelin transcription factor 1	2.03084	1.34	1	1	1	1	7.91357
431	Bta11692	Phospholipid-transporting ATPase 2A	3.40999	4.68	1	1	1	1	8.14795
432	Bta11785	Zinc finger protein	2.0919	0.86	1	1	1	2	6.94678
433	Bta11788	Deoxyribonuclease I	2.01417	5.43	1	1	1	1	8.04541
434	Bta11803	Lon protease homolog	2.71929	1.43	1	1	1	1	6.99072
435	Bta11813	Cathepsin L	2.36522	2.67	1	1	1	1	6.22705
436	Bta11816	NADH-quinone oxidoreductase subunit D	5.07526	1.88	1	1	1	2	6.37939
437	Bta11827	Sorting nexin-6	4.40847	2.53	1	1	2	2	6.75635
438	Bta11853	14-3-3 zeta protein	9.55554	14.98	2	3	3	4	4.88135
439	Bta11857	CG7175	2.67542	1.97	1	1	1	1	8.42627
440	Bta11997	Class B basic helix-loop-helix protein 5	2.38046	4.33	1	1	1	1	10.2134
441	Bta12011	Reverse transcriptase	2.06342	3.2	1	1	1	1	9.33447
442	Bta12015	Unknown protein	2.04104	13.53	1	1	1	1	11.3999
443	Bta12028	F-box only protein 28	6.87583	3.84	1	1	1	3	9.26123
444	Bta12050	G2/M phase-specific E3 ubiquitin-protein ligase	2.50741	2.34	1	1	1	1	5.021
445	Bta12068	40S ribosomal protein S3a	6.7691	11.02	2	2	2	3	9.68604
446	Bta12121	GATA-binding factor A	2.23552	4.01	1	1	1	1	8.04541
447	Bta12128	Zinc finger protein 449	2.0891	3.7	1	1	1	1	8.49951
448	Bta12142	Protein argonaute-2	2.10655	1.09	1	1	1	1	9.5249
449	Bta12183	Xenotropic and polytropic retrovirus receptor 1-like protein	2.42061	2.55	1	1	1	1	7.40088
450	Bta12239	Rho-associated protein kinase 2	4.5679	1.74	1	1	1	2	6.87354
451	Bta12249	T-complex protein subunit epsilon	2.0472	1.85	1	1	1	1	6.62451
452	Bta12273	Unknown protein	2.1316	1.88	1	1	1	3	5.56689
453	Bta12292	Protein dopey-1-like protein	5.14648	1.74	1	1	2	2	6.07471
454	Bta12336	KIAA2013 protein	2.24495	2.77	1	1	1	1	7.7085
455	Bta12358	Nucleoporin Ndc1, putative	2.04511	1.87	1	1	1	1	9.21729
456	Bta12379	Membrane-associated progesterone receptor component 2	5.42595	8.43	1	1	1	2	4.70361
457	Bta12443	Alpha-actinin-4, putative	2.52076	1.07	1	1	1	1	5.69385
458	Bta12449	ATP-dependent RNA helicase DHX8	4.15851	2.1	1	1	2	3	9.49561
459	Bta12532	Coiled-coil domain-containing protein 22	2.14531	6.47	1	1	1	1	6.11279
460	Bta12549	Ankyrin repeat domain-containing protein, putative	2.17814	2.31	1	1	1	1	4.97021
461	Bta12558	Valine--tRNA ligase	2.02866	1.53	1	1	1	1	7.37158
462	Bta12576	Beta-1,3-galactosyltransferase 5	6.36198	3.09	1	1	1	3	9.15869
463	Bta12587	BTB/POZ and Kelch domain-containing protein	4.7437	3.95	1	2	2	2	5.5415
464	Bta12626	Methyltransferase-like 20	2.76585	8.13	1	1	1	1	7.35693
465	Bta12641	60S ribosomal protein L5-like protein	9.20591	7.09	1	2	2	4	9.77393
466	Bta12642	Integrator complex subunit 7	0	4.92	1	1	1	1	7.31299
467	Bta12662	Unknown protein	4.09139	1.37	1	1	2	2	8.19189
468	Bta12696	Nk homeobox protein	4.18687	3.04	1	1	1	2	6.41748
469	Bta12723	Polymerase delta-interacting protein 2	2.2259	3.76	1	1	1	1	8.14795
470	Bta12748	5' nucleotidase	2.37546	2.13	1	1	1	1	5.75732
471	Bta12788	Alpha-methylacyl-CoA racemase	6.25372	5.51	1	1	1	4	6.80029
472	Bta12799	Pro-interleukin-16	2.12267	1.07	1	1	1	1	7.48877
473	Bta12869	Zinc finger protein 26	2.25378	1.03	1	1	1	1	8.14795
474	Bta12892	UDP-N-acetylhexosamine pyrophosphorylase	2.05816	1.83	1	1	1	1	6.75635
475	Bta12934	Peptidyl-prolyl cis-trans isomerase D	2.04515	6.04	1	1	1	1	8.25049
476	Bta12938	Vesicle transport through interaction with t-SNAREs-like protein 1B	2.20478	8.9	1	1	1	2	9.81787
477	Bta13056	Trafficking protein particle complex subunit 11	2.04115	0.99	1	1	1	1	6.66846
478	Bta13123	Transitional endoplasmic reticulum ATPase	10.538	2.43	2	1	2	4	5.65576
479	Bta13141	Reverse transcriptase	4.42561	3.03	1	2	2	3	9.34912
480	Bta13175	Vacuolar protein sorting-associated protein 16-like protein	2.62471	1.18	1	1	1	1	8.26514
481	Bta13199	Unknown protein	2.04526	6.28	1	1	1	1	5.05908
482	Bta13225	Protein slowmo	2.15987	6.42	1	1	1	1	7.03467
483	Bta13250	Threonine dehydratase	2.06835	3.49	1	1	1	1	6.46826
484	Bta13275	Dyslexia susceptibility 1 candidate gene 1 protein-like protein	2.10215	1.81	1	1	1	1	9.5542
485	Bta13310	30S ribosomal protein S19	2.66385	8.84	1	1	1	1	10.0669
486	Bta13315	Bromodomain-containing protein 1-like protein	2.13208	0.64	1	1	1	1	6.72705
487	Bta13392	HD domain-containing protein 2	2.07918	6.22	1	1	1	1	5.64307
488	Bta13448	RNA polymerase-associated protein CTR9-like protein	2.16622	1.43	1	1	1	1	8.95361
489	Bta13477	Unknown protein	4.86218	1.37	1	1	1	2	8.77783
490	Bta13550	Dynein heavy chain protein	2.0199	0.38	1	1	1	1	5.61768
491	Bta13633	Cyclic pyranopterin monophosphate synthase	2.69882	3.26	1	1	1	1	8.90967
492	Bta13643	Tyrosine-protein kinase receptor	3.10348	3.3	1	1	1	1	6.20166
493	Bta13669	Chitinase	2.02833	1.42	1	1	1	1	7.12256
494	Bta13768	Unknown protein	2.11462	5.05	1	1	1	2	9.0708
495	Bta13811	Reverse transcriptase	2.57742	2.16	1	1	1	1	8.89502
496	Bta13819	Unknown protein	2.65213	8.55	1	1	1	1	11.1802
497	Bta13821	CG14431, isoform B	4.2297	0.63	1	1	1	3	8.48486
498	Bta13825	Ankyrin repeat protein	2.30066	3.02	1	1	1	1	6.88818
499	Bta13836	Fras1 related extracellular matrix protein	2.01443	2.02	1	1	1	1	6.58057
500	Bta13862	Protein kinase	2.13228	2.05	1	1	1	1	9.62744
501	Bta13868	THAP domain-containing protein 4	2.00973	1.81	1	1	1	1	5.43994
502	Bta13918	V-type proton ATPase subunit d	5.27001	3.16	1	1	1	2	4.98291
503	Bta13923	Ubiquitin-conjugating enzyme E2 O	2.53052	0.81	1	1	1	1	5.35107
504	Bta13966	Unknown protein	2.01403	3.97	1	1	1	1	5.87158
505	Bta13970	Reverse transcriptase	4.08883	4.66	2	1	1	2	9.5542
506	Bta13971	Fatty acid synthase	8.47965	1.61	1	1	1	4	7.15186
507	Bta13981	Phospholipase A2	2.03328	6.4	1	1	1	1	6.07471
508	Bta14008	Unknown protein	2.01648	4.79	1	1	1	1	9.84717
509	Bta14011	2-oxo-4-hydroxy-4-carboxy-5-ureidoimidazoline decarboxylase	2.31142	9.2	1	1	1	1	5.61768
510	Bta14032	Acetyl-CoA carboxylase, putative	31.6881	1.98	1	4	4	13	6.03662
511	Bta14058	Nucleolar GTP-binding protein 1	7.77811	2.18	1	1	1	3	9.72998
512	Bta14083	Ubiquitin carboxyl-terminal hydrolase	4.07593	1.4	1	2	2	2	5.2749
513	Bta14113	Unknown protein	2.03965	3.13	1	1	1	1	4.88135
514	Bta14135	ADP-ribosylation factor family	3.23942	6.74	1	1	1	1	6.68311
515	Bta14164	GTP-binding protein GEM	2.30682	12.59	1	1	1	1	9.51025
516	Bta14233	Dynein heavy chain 7, axonemal	7.91955	9.48	1	1	1	3	6.12549
517	Bta14250	Prohibitin-1	9.69106	4.4	1	1	1	4	5.73193
518	Bta14268	Cytoplasmic FMR1-interacting protein	6.46411	1.82	3	1	1	3	8.76318
519	Bta14277	Exocyst complex component 7	2.01662	1.7	1	1	1	1	6.96143
520	Bta14316	Pol polyprotein	2.15167	1.09	1	1	1	1	9.08545
521	Bta14401	ACYPI008426 protein	4.21753	5.15	1	1	1	5	7.50342
522	Bta14409	Unknown protein	2.03078	8.44	1	1	1	1	11.9272
523	Bta14459	Mitochondrial Rho GTPase	2.05603	2.04	1	1	1	1	5.69385
524	Bta14461	Kinesin-like protein	2.56106	1.76	1	1	1	1	7.79639
525	Bta14462	Testis-expressed sequence 9 protein	8.92117	3.68	1	1	1	5	9.17334
526	Bta14524	Reverse transcriptase	2.15103	2.04	1	1	1	1	9.51025
527	Bta14541	BSD domain-containing protein 1	2.69388	3.57	1	1	1	1	4.67822
528	Bta14542	Poly(ADP-ribose) glycohydrolase	2.46603	1.71	1	1	1	2	7.47412
529	Bta14589	Tetratricopeptide repeat protein 4	2.00738	3.13	1	1	1	1	5.93506
530	Bta14619	Receptor expression-enhancing protein 5	7.18363	5.09	1	1	1	3	8.32373
531	Bta14621	Structural maintenance of chromosomes protein 5	4.10063	1.03	1	1	1	2	8.44092
532	Bta14685	Cat eye syndrome critical region protein 2	2.09191	0.95	1	1	1	1	7.95752
533	Bta14773	Zinc finger protein 516	2.64226	2.2	1	1	1	1	6.44287
534	Bta14798	Nucleoside diphosphate kinase	2.1179	10.2	1	1	1	1	8.00146
535	Bta14801	Protein disulfide-isomerase A5	3.17126	0.79	1	1	1	1	4.4624
536	Bta14838	Protein ERGIC-53	20.7034	7.44	1	3	3	6	6.44287
537	Bta14857	Glycine--tRNA ligase	2.03457	2.02	1	1	1	1	7.57666
538	Bta14869	Disks large-like protein 5	4.12648	1.72	1	1	2	2	7.13721
539	Bta14881	Alpha crystallin A chain, putative	13.956	22.38	1	2	2	4	5.8335
540	Bta14984	Alkaline phosphatase	2.09829	2.14	1	1	1	1	6.23975
541	Bta14987	Lachesin	2.00973	7.94	1	1	1	1	10.1108
542	Bta14993	DNA polymerase	2.157	1.12	1	1	1	1	7.88428
543	Bta14994	Unknown protein	2.01701	20.93	1	1	1	1	9.48096
544	Bta15037	Catenin delta-2	2.05413	0.85	1	1	1	1	7.6792
545	Bta15089	Cystathionine gamma-lyase	2.54642	5.68	1	1	1	1	6.68311
546	Bta15098	RNA-binding protein 47	2.10446	2.76	1	1	1	1	8.83643
547	Bta15109	Vesicle-fusing ATPase	11.9088	4.35	1	2	3	5	7.48877
548	Bta15245	Nuclear pore complex protein Nup85	3.07207	7.35	1	1	1	1	6.69775
549	Bta15272	Inhibin beta chain	2.51764	10.75	1	1	1	1	7.13721
550	Bta15296	discoidin domain-containing receptor 2	2.07074	1.32	1	1	1	1	6.27783
551	Bta15339	Translocon-associated protein subunit delta, putative	2.8699	8.28	1	1	1	1	5.5542
552	Bta15369	Endothelin-converting enzyme, putative	2.08298	2.56	1	1	1	1	6.27783
553	Bta15515	Leucine-rich repeat-containing protein 7	2.15919	1.23	1	1	1	1	6.30322
554	Bta15516	Heparan sulfate 2-O-sulfotransferase 1	2.08026	4.81	1	1	1	1	9.51025
555	Bta15536	AAA-ATPase-like domain-containing protein	2.1827	3.08	1	1	1	1	6.94678
556	Bta15547	G-protein-signaling modulator 2	2.1688	6.37	1	1	1	1	5.5542
557	Bta15556	Acyl-CoA dehydrogenase	15.6408	8.85	1	3	3	5	8.104
558	Bta15586	Vesicle-associated membrane protein 2	3.74223	9.24	1	1	1	1	7.50342
559	Bta15690	Kinesin light chain	2.03649	2.54	1	1	1	1	6.44287
560	Bta15713	SCP-like extracellular protein	2.30195	3.67	1	1	1	1	10.272
561	Bta15722	PHD finger protein 10	2.24543	0.41	1	1	1	2	4.57666
562	Bta15724	Structural maintenance of chromosomes protein	6.1536	3.37	2	3	3	3	6.50732
563	Bta15751	Unknown protein	3.10332	7.63	1	1	1	1	7.35693
564	Bta15783	Unknown protein	2.06738	1.72	1	1	1	1	5.93506
565	Bta15867	Nucleosome-remodeling factor subunit BPTF	2.26343	0.41	1	1	1	1	8.646
566	Bta15868	Reverse transcriptase	2.61009	2.44	1	1	1	1	8.95361
567	Bta20015	hypothetical protein	2.0297	3.21	1	1	1	1	8.04541
568	Bta20023	Esterase	11.0787	4.17	2	1	2	5	8.20654
